# Supplementary material
Source: Royal Society of Chemistry journal article supplement (doi:10.1039/d6nj01090c)
Supplement: d6nj01090c1.pdf [file d6nj01090c1.pdf]

## Supporting Information

### **Bifunctional fluorescent iron-doped carbon dot-based nanozyme for highly sensitive dual-mode cascade detection of D-galactose**

Lei Wang <sup>a</sup>, Weiping Liu <sup>b</sup>, Dan Qiu <sup>a</sup>, Xingju Li <sup>a</sup>, Yawen Lin <sup>a</sup>, Yan Zhao <sup>a,c\*</sup>

<sup>a</sup> School of Science, Xihua University, Chengdu, 610039, China

<sup>b</sup> Department of Clinical laboratory, Wuhan Third Hospital, Tongren Hospital of Wuhan University, Wuhan, 430060, China

<sup>c</sup> Sichuan Provincial Engineering Research Center of Molecular Targeted Diagnostic & Therapeutic Drugs, Xihua University, Chengdu 610039, China

\*Corresponding authors:

Dr. Yan Zhao, Email address: zhao518yan@163.com

## **Table of contents:**

### **Materials and apparatus**

**Fig. S1.** (A) Effects of  $\text{Fe}^{2+}$  concentration, (B) mass ratio of AEEA to PPD, and (C) reaction time on the fluorescence intensity and absorbance of the Fe-CDs system.

**Fig. S2.** (A) XPS survey spectrum of Fe-CDs, and high-resolution XPS spectra of (B) C 1s, (C) N 1s, (D) O 1s, (E) Si 2p, and (F) Fe 2p.

**Fig. S3.** Relationship between fluorescence intensity and absorbance of Fe-CDs and quinine sulfate under the same excitation wavelength

**Fig. S4.** (A) Effects of ionic strength, (B) UV irradiation time, and (C) pH on the fluorescence intensity of Fe-CDs.

**Fig. S5.** Steady-state kinetic studies of Fe-CDs for (A)  $\text{H}_2\text{O}_2$  and (C) TMB; corresponding Lineweaver-Burk double-reciprocal plots for (B)  $\text{H}_2\text{O}_2$  and (D) TMB.

**Fig. S6.** Zeta potentials of Fe-CDs, oxTMB, and Fe-CDs mixed with oxTMB.

**Fig. S7.** Effects of reaction conditions on the fluorescence intensity of the sensing system: (A) reaction temperature, (B) Fe-CDs concentration, (C) reaction time, and (D) pH.

**Fig. S8.** (A) Fluorescence responses of the Fe-CDs/TMB system upon addition of different concentrations of  $\text{H}_2\text{O}_2$ . (B) Linear relationship between fluorescence intensity and  $\text{H}_2\text{O}_2$  concentration. (C) Absorbance of the Fe-CDs/TMB system after adding varying levels of  $\text{H}_2\text{O}_2$ . (D) Linear relationship between absorbance intensity and  $\text{H}_2\text{O}_2$  concentration.

**Fig. S9.** (A) Fluorescence intensity and (B) UV absorbance of the same sample at

different time points.

**Fig. S10.** Effects of different potential interferents on D-Gal detection: (A) fluorescence intensity and (B) UV absorption.

**Table S1.** Comparison of the kinetic parameters of different peroxidase mimics.

**Table S2.** Comparison of analytical methods for the determination of D-Gal

## Materials and apparatus

p-Phenylenediamine (PPD), Ferrous chloride ( $\text{FeCl}_2$ ), o-phenylenediamine (OPD), N-aminoethyl ethanolamine (AEEA),  $\text{H}_2\text{O}_2$ , 3,3',5,5'-tetramethylbenzidine (TMB), sodium acetate (NaAc), acetic acid (HAc), ascorbic acid (AA), uric acid (UA), histidine (His), isopropyl alcohol (IPA), catalase (CAT), superoxide dismutase (SOD), terephthalic acid (TA), and 5,5-dimethyl-1-pyrroline N-oxide (DMPO) were purchased from Macklin Biochemical Co., Ltd. (Shanghai, China). SA, SOX, isoleucine (Ile), aspartate (Asp), valine (Val), arginine (Arg), threonine (Thr), alanine (Ala), cysteine (Cys), tryptophan (Trp), alkaline phosphatase (ALP), thrombin (TB), xanthine oxidase (XOD), trypsin (TRY), and glucose were supplied by Sigma-Aldrich Chemical Co. (St. Louis, MO, USA). Urine samples from healthy donors and prostate cancer patients were obtained from Tongren Hospital of Wuhan University.

UV-Vis absorption spectra were collected on a Shimadzu UV-2700 spectrometer (Shimadzu, Japan). Fluorescence spectra measurements were carried out on a HORIBA FluoroMax-4 spectrofluorometer (HORIBA, Japan). Fluorescence lifetimes were recorded with an Edinburgh FLS1000 spectrofluorometer (Edinburgh, UK). Electron paramagnetic resonance (EPR) spectra were recorded using an MS-5000X spectrometer (Magnetech, Germany). Atomic force microscopy (AFM) images were obtained on a Dimension FastScan atomic force microscope (Bruker, Germany). X-ray photoelectron spectroscopy (XPS) measurements were carried out using an ESCALAB 250Xi instrument (Thermo Fisher Scientific, USA). Transmission electron microscopy (TEM) was performed on an FEI Talos F200X instrument (FEI, USA). X-ray

diffraction (XRD) measurements were conducted on a DX-2800 diffractometer (HAOYUAN, China). Fourier transform infrared spectroscopy (FT-IR) spectra were collected using a Nicolet iS10 Fourier transform spectrometer (Thermo Fisher Scientific, USA).

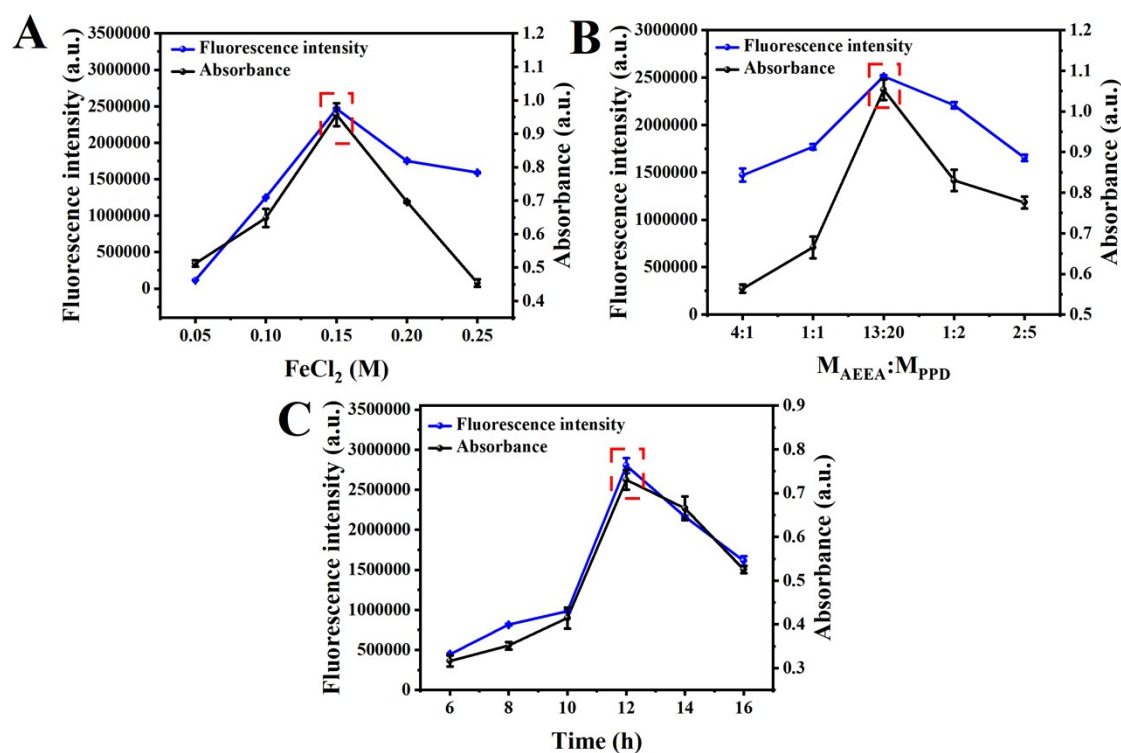

**Fig. S1.** (A) Effects of  $\text{Fe}^{2+}$  concentration, (B) mass ratio of AEEA to PPD, and (C) reaction time on the fluorescence intensity and absorbance of the Fe-CDs system.

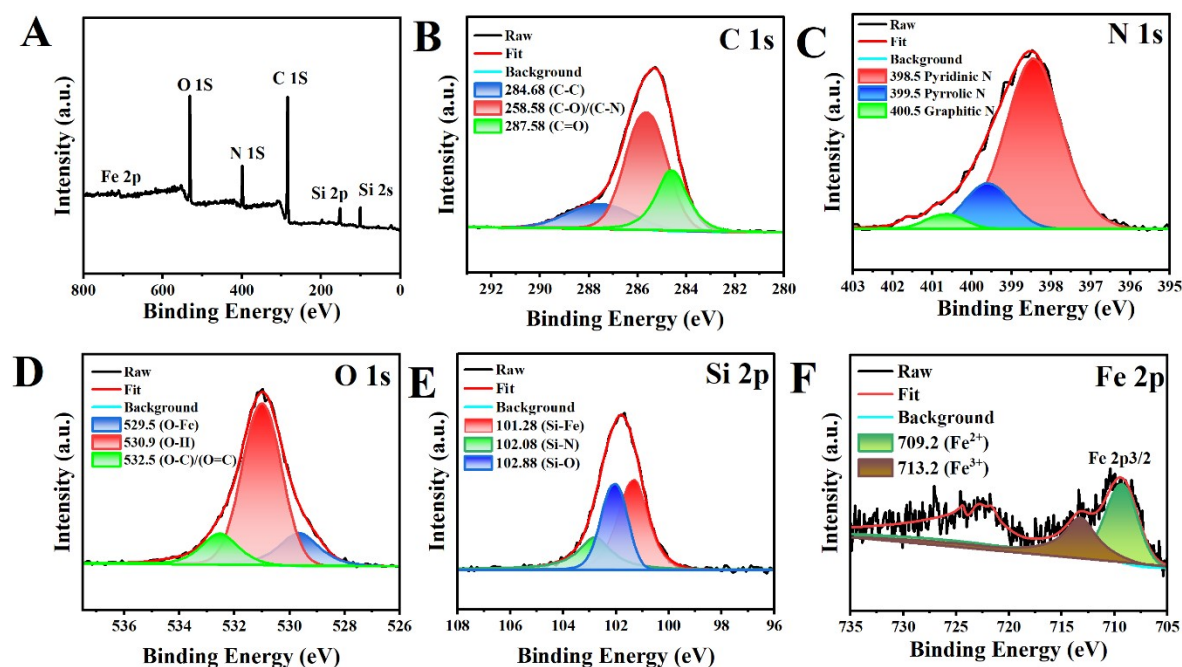

**Fig. S2.** (A) XPS survey spectrum of Fe-CDs, and high-resolution XPS spectra of (B) C 1s, (C) N 1s, (D) O 1s, (E) Si 2p, and (F) Fe 2p.

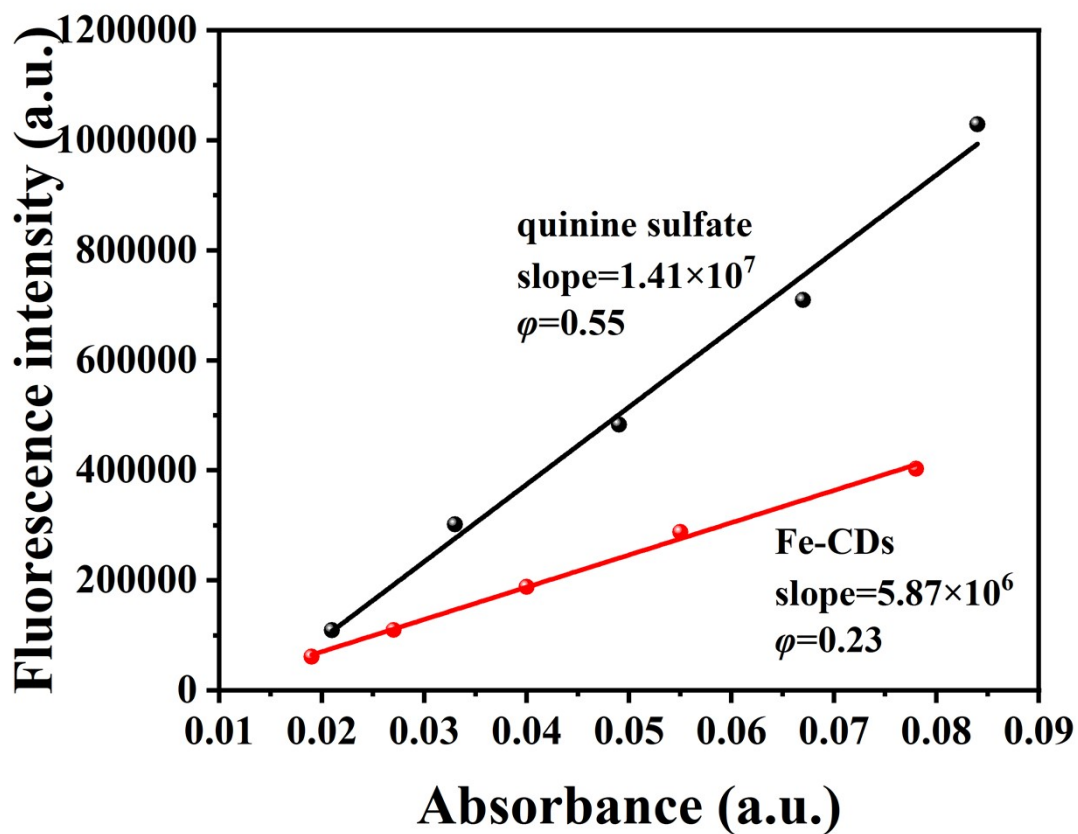

**Fig. S3.** Relationship between fluorescence intensity and absorbance of Fe-CDs and quinine sulfate under the same excitation wavelength

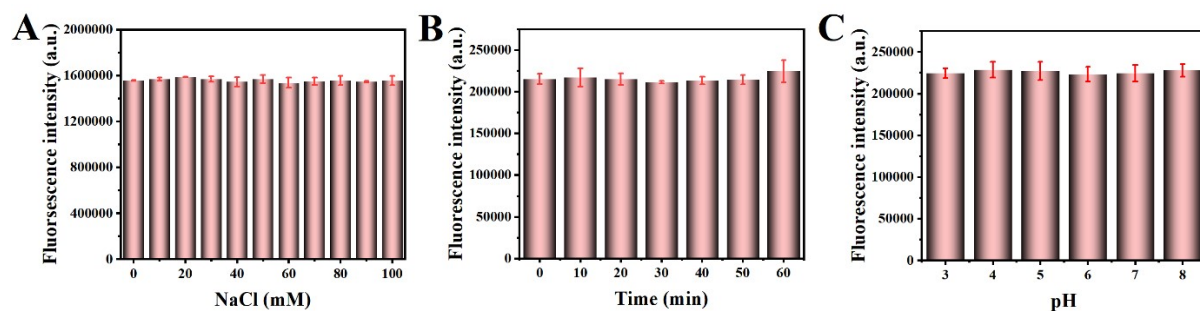

**Fig. S4.** (A) Effects of ionic strength, (B) UV irradiation time, and (C) pH on the fluorescence intensity of Fe-CDs.

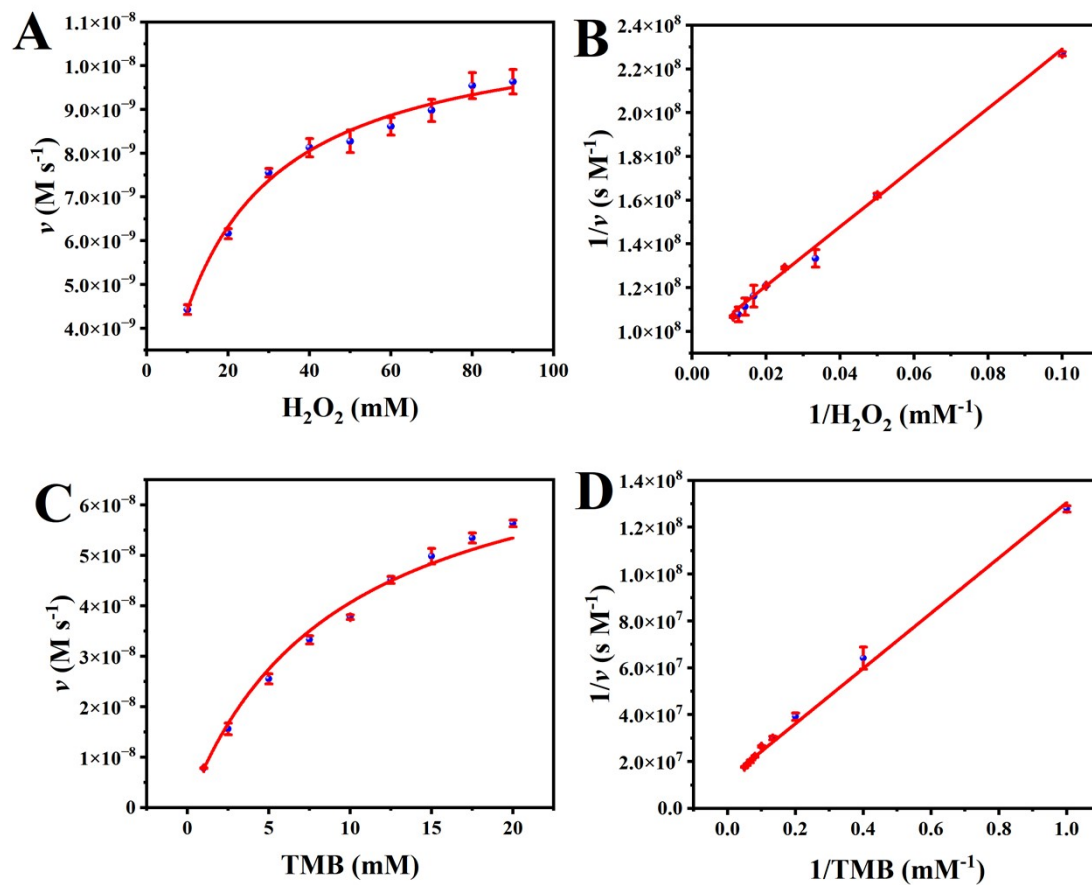

**Fig. S5.** Steady-state kinetic studies of Fe-CDs for (A)  $\text{H}_2\text{O}_2$  and (C) TMB; corresponding Lineweaver-Burk double-reciprocal plots for (B)  $\text{H}_2\text{O}_2$  and (D) TMB.

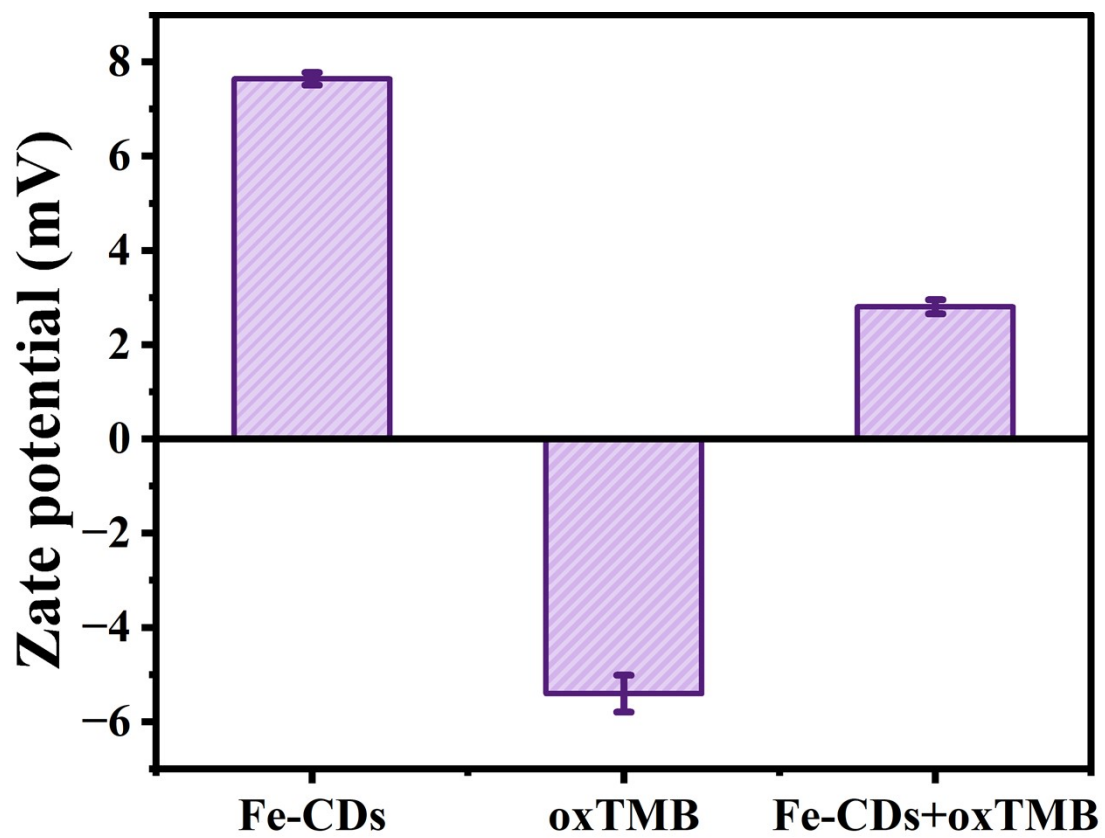

Fig. S6. Zeta potentials of Fe-CDs, oxTMB, and Fe-CDs mixed with oxTMB.

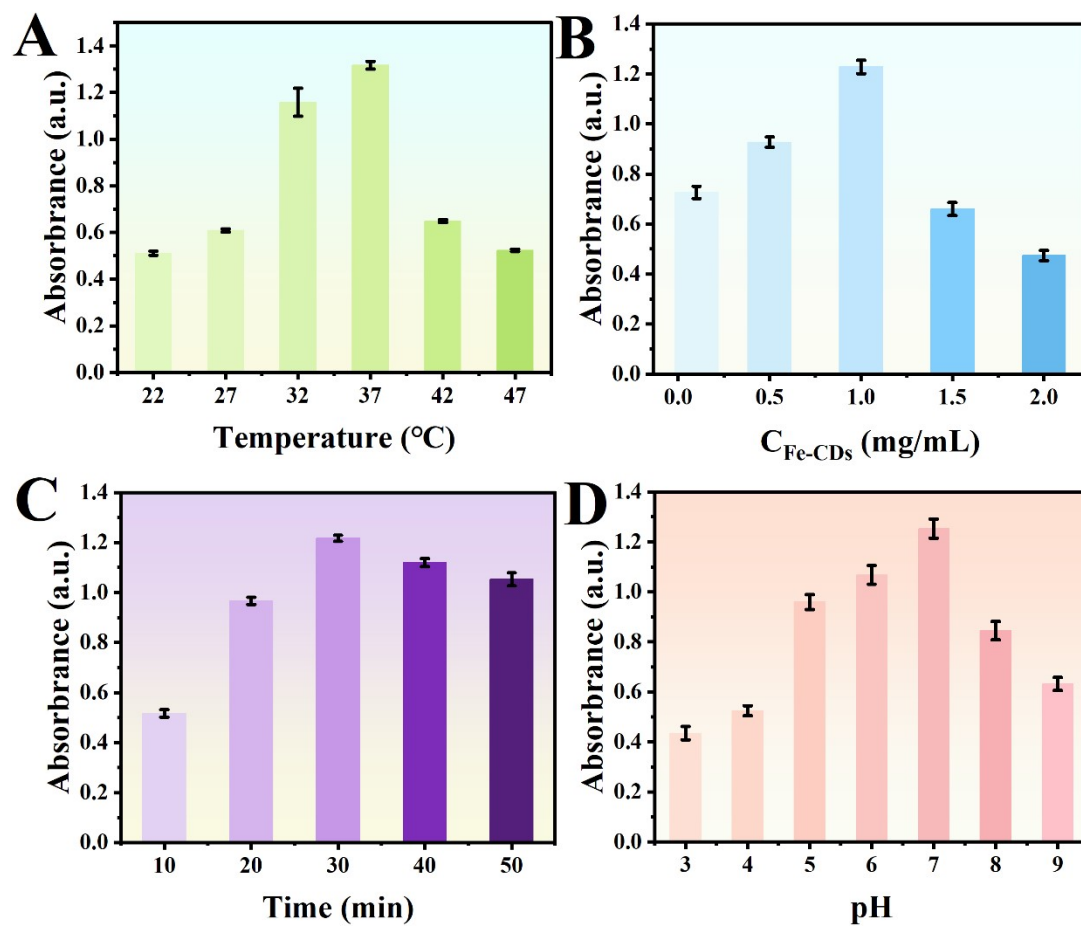

**Fig. S7.** Effects of reaction conditions on the fluorescence intensity of the sensing system: (A) reaction temperature, (B) Fe-CDs concentration, (C) reaction time, and (D) pH.

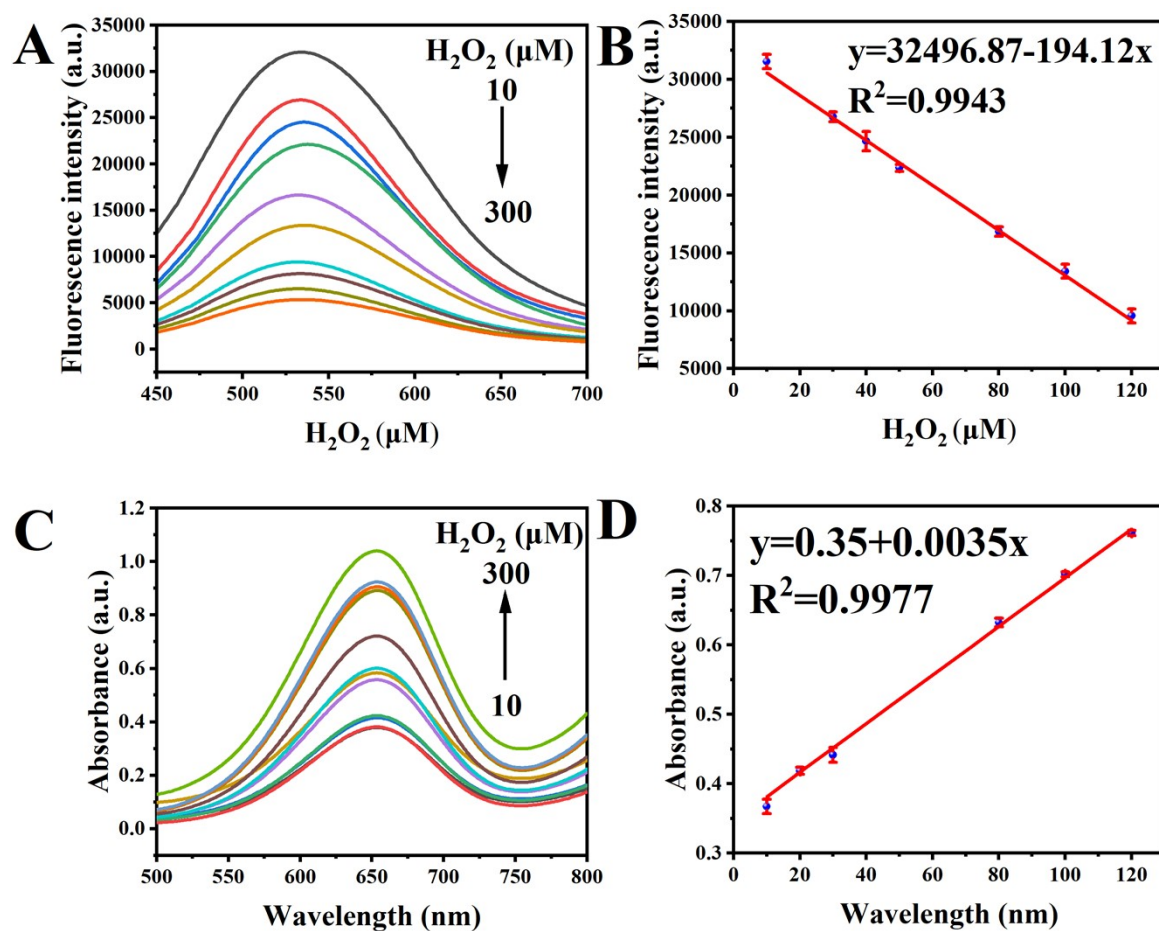

**Fig. S8.** (A) Fluorescence responses of the Fe-CDs/TMB system upon addition of different concentrations of  $H_2O_2$ . (B) Linear relationship between fluorescence intensity and  $H_2O_2$  concentration. (C) Absorbance of the Fe-CDs/TMB system after adding varying levels of  $H_2O_2$ . (D) Linear relationship between absorbance intensity and  $H_2O_2$  concentration.

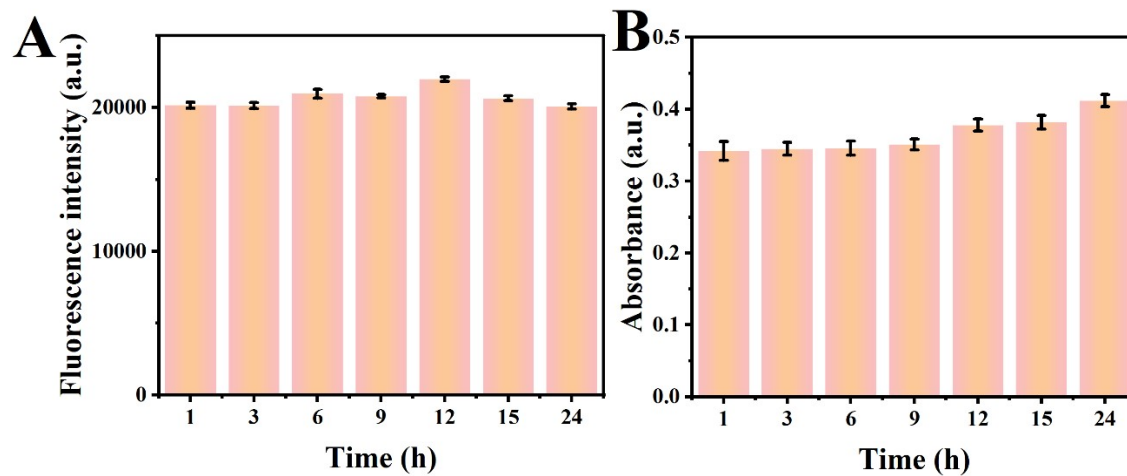

**Fig. S9.** (A) Fluorescence intensity and (B) UV absorbance of a sample measured at different time points.

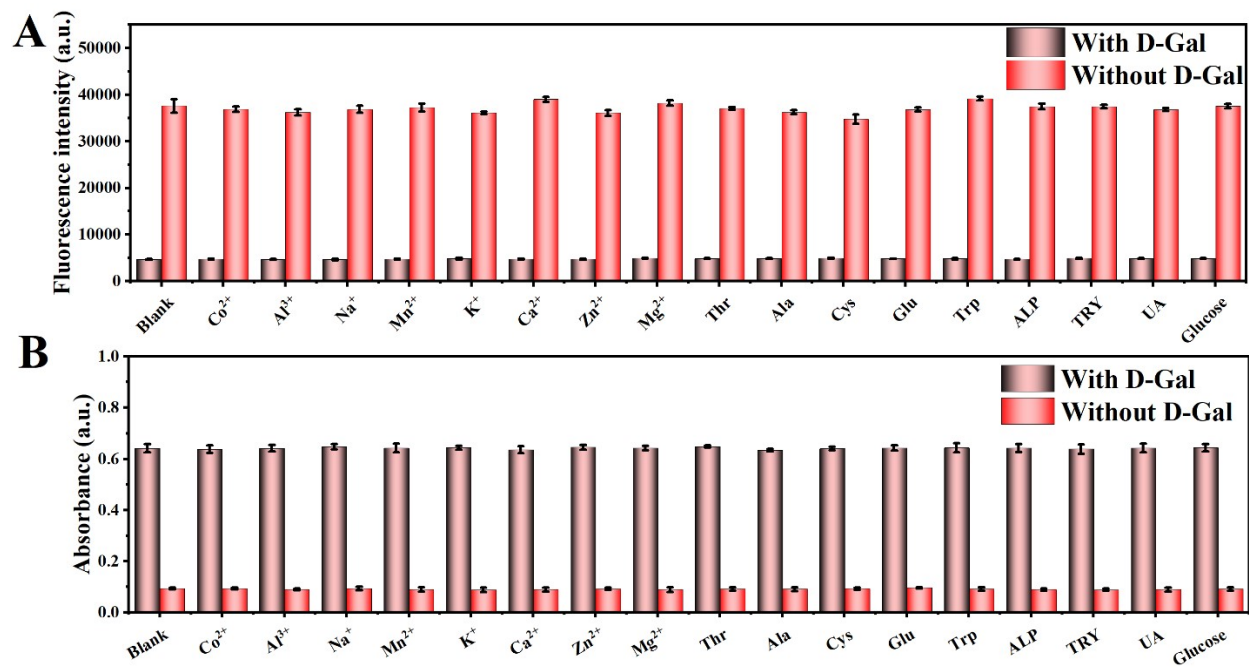

**Fig. S10.** Effects of different potential interferents on D-Gal detection: (A) fluorescence intensity and (B) UV absorbance.

**Table S1.** Comparison of the kinetic parameters of different peroxidase mimics.

| Catalyst                 | Substrate                     | $K_m$ (mM) | $V_{max}$ (M/s)        | Reference |
|--------------------------|-------------------------------|------------|------------------------|-----------|
| KCl-LCDs                 | H <sub>2</sub> O <sub>2</sub> | 0.19       | $11.63 \times 10^{-8}$ | S1        |
|                          | TMB                           | 0.26       | $2.51 \times 10^{-6}$  |           |
| HRP                      | H <sub>2</sub> O <sub>2</sub> | 0.434      | $8.71 \times 10^{-8}$  | S2        |
|                          | TMB                           | 3.70       | $10.00 \times 10^{-8}$ |           |
| LS-CDs                   | H <sub>2</sub> O <sub>2</sub> | 0.32       | $19.53 \times 10^{-7}$ | S3        |
|                          | TMB                           | 0.26       | $15.62 \times 10^{-7}$ |           |
| WS <sub>2</sub> /rGO     | H <sub>2</sub> O <sub>2</sub> | 10.001     | $0.93 \times 10^{-8}$  | S4        |
|                          | TMB                           | 22.406     | $0.96 \times 10^{-8}$  |           |
| Cu-BDC@FeMo <sub>6</sub> | H <sub>2</sub> O <sub>2</sub> | 0.69       | $7.12 \times 10^{-8}$  | S5        |
|                          | TMB                           | 1.81       | $10.53 \times 10^{-8}$ |           |
| Cu-NS                    | H <sub>2</sub> O <sub>2</sub> | 14.3       | $6.79 \times 10^{-8}$  | S6        |
|                          | TMB                           | 0.1        | $3.89 \times 10^{-8}$  |           |
| Co@Fe MOG                | H <sub>2</sub> O <sub>2</sub> | 0.72       | $2.87 \times 10^{-8}$  | S7        |
|                          | TMB                           | 3.13       | $10 \times 10^{-8}$    |           |
| Fe-CDs                   | H <sub>2</sub> O <sub>2</sub> | 0.443      | $1.066 \times 10^{-7}$ | This work |
|                          | TMB                           | 0.0932     | $7.911 \times 10^{-7}$ |           |

**Table S2.** Comparison of analytical methods for the determination of D-Gal

| Detection method | Sensing system                 | Linear range (mM) | LOD ( $\mu$ M) | Ref.      |
|------------------|--------------------------------|-------------------|----------------|-----------|
| Phosphorimetry   | QDs                            | 0.02-0.8          | 8              | S8        |
| Electrochemistry | Os-based redox polymers        | 1-8               | 39             | S9        |
| Colorimetry      | GAO <sub>x</sub> @MOF          | 0.02-1            | 6.7            | S10       |
| Fluorimetry      | APBA-Cdots                     | 0-0.5             | 6.2            | S11       |
| Colorimetry      | GeO <sub>2</sub> nanoparticles | 0.1-1.5           | 50             | S12       |
| Fluorimetry      | Fe-CDs                         | 0.001-120         | 0.25           | This work |
| Colorimetry      | Fe-CDs                         | 0.1-100           | 19             |           |

## References

- S1 X. Y. Xu, Q. J. Sun, Y. M. Ma, X. X. Jiang, N. Niu and L. G. Chen, Synthesis of KCl-doped lignin carbon dots nanoenzymes for colorimetric sensing glutathione in human serum, *Sensor Actuat. B-Chem.*, 2022, **364**, 9, DOI: 10.1016/j.snb.2022.131881.
- S2 S. Y. Fu, S. Wang, X. D. Zhang, A. H. Qi, Z. R. Liu, X. Yu, C. F. Chen and L. L. Li, Structural effect of Fe<sub>3</sub>O<sub>4</sub> nanoparticles on peroxidase-like activity for cancer therapy, *Colloid Surf. B-Biointerfaces*, 2017, **154**, 239-245, DOI: 10.1016/j.colsurfb.2017.03.038.
- S3 C. H. Yin, Q. J. Sun, M. Wu, X. L. Yu, N. Niu and L. G. Chen, Novel lignin-derived carbon dots nanozyme cascade-amplified for ratiometric fluorescence detection of xanthine oxidase and intracellular imaging, *Sens. Actuators, B*, 2024, **406**, 10, DOI: 10.1016/j.snb.2024.135458.
- S4 S. Keerthana, A. Rajapriya, C. Viswanathan and N. Ponpandian, Enzyme like-colorimetric sensing of H<sub>2</sub>O<sub>2</sub> based on intrinsic peroxidase mimic activity of WS<sub>2</sub> nanosheets anchored reduced graphene oxide, *J. Alloy. Compd.*, 2021, **889**, 11, DOI: 10.1016/j.jallcom.2021.161669.
- S5 Y. Xu, J. H. Zhou, P. Sun, P. Li, D. X. Han, X. H. Wang and F. Chai, The construction of peroxidase-like Cu-BDC@FeMo<sub>6</sub> for colorimetric detection of H<sub>2</sub>O<sub>2</sub> and dopamine, *Sep. Purif. Technol.*, 2025, **353**, 13, DOI: 10.1016/j.seppur.2024.128396.
- S6 X. P. Yang, X. Y. Xie, L. Jiang, Y. X. Fan, C. L. Zhang and Y. Wang, Cu-NC single-

- atom nanozymes with peroxidase-like activity for colorimetric detection of D-penicillamine, *Talanta*, 2025, **283**, 8, DOI: 10.1016/j.talanta.2024.127131.
- S7 M. Wang, X. G. Zhu, Y. N. Yin, G. X. Ling and P. Zhang, Porous reticular Co@Fe metal-organic gel: dual-function simulated peroxidase nanozyme for both colorimetric sensing and antibacterial applications, *J. Mat. Chem. B*, 2024, **12**, 5418-5430, DOI: 10.1039/d4tb00446a.
- S8 J. Z. Lv, W. L. Yang and Y. M. Miao, Preparation of galactose oxidase functional phosphorescent quantum dots and detection of D-galactose, *Spectroc. Acta Pt. A-Molec. Biomolec. Spectr.*, 2020, **240**, 8, DOI: 10.1016/j.saa.2020.118599.
- S9 C. Figueiredo, A. García-Ortega, T. Mandal, A. Lielpetere, F. Cervantes, D. Demurtas, E. Magner, F. J. Plou, W. Schuhmann, D. Leech, M. Pita and A. L. De Lacey, An oxygen-insensitive amperometric galactose biosensor based on galactose oxidase co-immobilized with an Os-complex modified redox polymer, *Electrochim. Acta*, 2023, **472**, 8, DOI: 10.1016/j.electacta.2023.143438.
- S10 H. Huang, D. H. Song, W. J. Zhang, Y. Sun and Y. X. Li, One step cascade detection of galactose based on a galactose oxidase-composited peroxidase nanozyme, *Anal. Methods*, 2022, **14**, 3644-3651, DOI: 10.1039/d2ay01224c.
- S11 J. A. Yang, X. W. He, L. X. Chen and Y. K. Zhang, The selective detection of galactose based on boronic acid functionalized fluorescent carbon dots, *Anal. Methods*, 2016, **8**, 8345-8351, DOI: 10.1039/c6ay02530g.
- S12 P. T. Nguyen, H. T. Ahn and M. I. Kim, Reagent-free colorimetric assay for galactose using agarose gel entrapping nanoceria and galactose oxidase,
